CORRECTION

# Correction: Pathogenicity and Complete Genome Characterization of Fowl Adenoviruses Isolated from Chickens Associated with Inclusion Body Hepatitis and Hydropericardium Syndrome in China

Jing Zhao, Qi Zhong, Ye Zhao, Yan-xin Hu, Guo-zhong Zhang

The values in Table 1 and the corresponding values reported in the Sequence Alignment and Analysis subsection of the results are incorrect. The authors have provided a corrected [Table 1](#) and article text here.

**Table 1. Percent nucleotide sequence identities of the whole genomes of aviadenoviruses.**

| Species | Strain | Accession number | Homology    |             |             |
|---------|--------|------------------|-------------|-------------|-------------|
|         |        |                  | HBQ12       | BJH13       | JSJ13       |
| FAdV-A  | CELO   | U46933           | 56.6        | 56.6        | 54.3        |
| FAdV-B  | 340    | NC_021221        | 63.4        | 63.3        | 55.4        |
| FAdV-C  | ON1    | GU188428         | 54.9        | 54.8        | <b>98.3</b> |
| FAdV-C  | KR-5   | HE608152         | 54.9        | 54.8        | <b>98.4</b> |
| FAdV-D  | A-2A   | AF083975         | <b>95.8</b> | <b>95.8</b> | 55.2        |
| FAdV-E  | HG     | GU734104         | 72.9        | 72.9        | 56.4        |
| FAdV-D  | HBQ12  | KM096545         | /           | 99.7        | 55.6        |
| FAdV-D  | BJH13  | KM096546         | 99.7        | /           | 55.5        |
| FAdV-C  | JSJ13  | KM096544         | 55.6        | 55.5        | /           |

doi:10.1371/journal.pone.0161744.t001

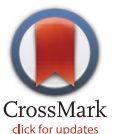

**OPEN ACCESS**

**Citation:** Zhao J, Zhong Q, Zhao Y, Hu Y-x, Zhang G-z (2016) Correction: Pathogenicity and Complete Genome Characterization of Fowl Adenoviruses Isolated from Chickens Associated with Inclusion Body Hepatitis and Hydropericardium Syndrome in China. PLoS ONE 11(8): e0161744. doi:10.1371/journal.pone.0161744

**Published:** August 22, 2016

**Copyright:** © 2016 Zhao et al. This is an open access article distributed under the terms of the [Creative Commons Attribution License](#), which permits unrestricted use, distribution, and reproduction in any medium, provided the original author and source are credited.

## Sequence alignment and analysis

The percent sequence identity for available aviadenovirus whole genomes are given in [Table 1](#). Strain HBQ12 and BJH13 were almost identical (99.7%) at the nucleotide level and they showed the highest sequence homology (95.8%) with strain A-2A (FAdV-D, Accession No. AF083975) isolated in the US at nucleotide level. Whereas they showed a low sequence identity (<72.9%) with the members of other aviadenovirus species. JSJ13 strain was more matched to the KR-5 strain (FAdV-C) isolated in Japan (Accession No. HE608152, 98.4% of identity at the nucleotide level). Sequence identities between JSJ 13 and other species ranged from 54.3% (between JSJ13 and FAdV-A) to 56.4% (between JSJ13 and FAdV-E).

## Reference

1. Zhao J, Zhong Q, Zhao Y, Hu Y-x, Zhang G-z (2015) Pathogenicity and Complete Genome Characterization of Fowl Adenoviruses Isolated from Chickens Associated with Inclusion Body Hepatitis and Hydropericardium Syndrome in China. PLoS ONE 10(7): e0133073. doi: [10.1371/journal.pone.0133073](#) PMID: [26167857](#)
